# Supplementary material for: Testing the Impact of Familiarity with Health Benefits Information on Dietary Supplement Choice in Pregnancy: An Online Choice Experiment
Source: MDPI journal article supplement (doi:10.3390/nu14091707), 2022-04-20
Supplement: s1 [file s1]

## Online supplementary material

**Figure S1.** Survey question assessing beliefs about health benefits of nutrients.

16. There are various nutrients that might be added to food, drinks or vitamin tablets and which might be claimed to have health benefits. Some of these benefit an unborn child, some benefit the person who takes them, whilst others have no demonstrated clinical benefit. Please consider each nutrient below and tick the box(es) to indicate which health claim(s) you believe to be true.

(select all that apply for each nutrient; select at least one option in each row)

[illegible]

**Figure S2.** Example of a choice set.

|                     | Fortified food                                                                                      | Fortified drink                                                                                            | Supplement Tablet                                                                                                      |
|---------------------|-----------------------------------------------------------------------------------------------------|------------------------------------------------------------------------------------------------------------|------------------------------------------------------------------------------------------------------------------------|
| <b>Product</b>      | <br>Cereal (1 cup) | <br>Juice (1 cup, 250ml) | <br>Multivitamin tablet (1 per day) |
| <b>Cost per day</b> | \$0.25/day                                                                                          | \$0.30/day                                                                                                 | \$0.65/day                                                                                                             |
| <b>Brand</b>        | A specific brand                                                                                    | A specific brand                                                                                           | No specific brand or a generic brand                                                                                   |
| <b>Endorsement</b>  | Endorsed by the National Health and Medical Research Council (NHMRC)                                | Scientifically proven                                                                                      | Endorsed by the CSIRO                                                                                                  |
| <b>Absorption</b>   | No claim                                                                                            | No claim                                                                                                   | Easy to digest and absorb                                                                                              |
| <b>Iodine</b>       | -                                                                                                   | 150 µg                                                                                                     | 250 µg                                                                                                                 |
| <b>Folate</b>       | 800 µg                                                                                              | 800 µg                                                                                                     | 400 µg                                                                                                                 |
| <b>Omega 3</b>      | 115 mg                                                                                              | -                                                                                                          | 500 mg                                                                                                                 |
| <b>Vitamin D</b>    | 400 IU                                                                                              | 200 IU                                                                                                     | -                                                                                                                      |

If you want to review the above attributes again, please [click here](#) to open a separate glossary page.

**Below are some information on nutrient benefits**

**Iodine** plays an important role in the normal development of the baby's brain.

**Vitamin D** plays an essential role in strengthening baby's bones.

Q1 Which product do you like most? (choose one answer)

☐ Fortified food

☐ Fortified drink

☐ Supplement tablet

Q2 Which product do you like least? (choose one answer)

☐ Fortified food

☐ Fortified drink

☐ Supplement tablet

Q3 Would you actually buy your most preferred product? (choose one answer)

☐ Yes

☐ No

**Table S1.** Model performance for models with up to six latent classes.

| <b>Model</b> | <b>BIC</b> | <b>AIC</b> | <b>AIC3</b> | <b>CAIC</b> | <b>Number of<br/>parameters</b> | <b>L<sup>2</sup></b> | <b>Classification<br/>Error</b> |
|--------------|------------|------------|-------------|-------------|---------------------------------|----------------------|---------------------------------|
| 1-class      | 24993.4    | 24748.7    | 24800.7     | 25045.4     | 52                              | 24600.3              | 0.000                           |
| 2-class      | 22659.9    | 22156.2    | 22263.2     | 22766.9     | 107                             | 21897.9              | 0.039                           |
| 3-class      | 21854.8    | 21092.2    | 21254.2     | 22016.8     | 162                             | 20723.9              | 0.058                           |
| 4-class      | 21552.1    | 20530.7    | 20747.7     | 21769.1     | 217                             | 20052.3              | 0.071                           |
| 5-class      | 21559.6    | 20279.4    | 20551.4     | 21831.6     | 272                             | 19691.0              | 0.077                           |
| 6-class      | 21651.1    | 20111.9    | 20438.9     | 21978.1     | 327                             | 19413.6              | 0.109                           |
